# Supplementary material
Source: PubMed Central journal article supplement (PMC156274)

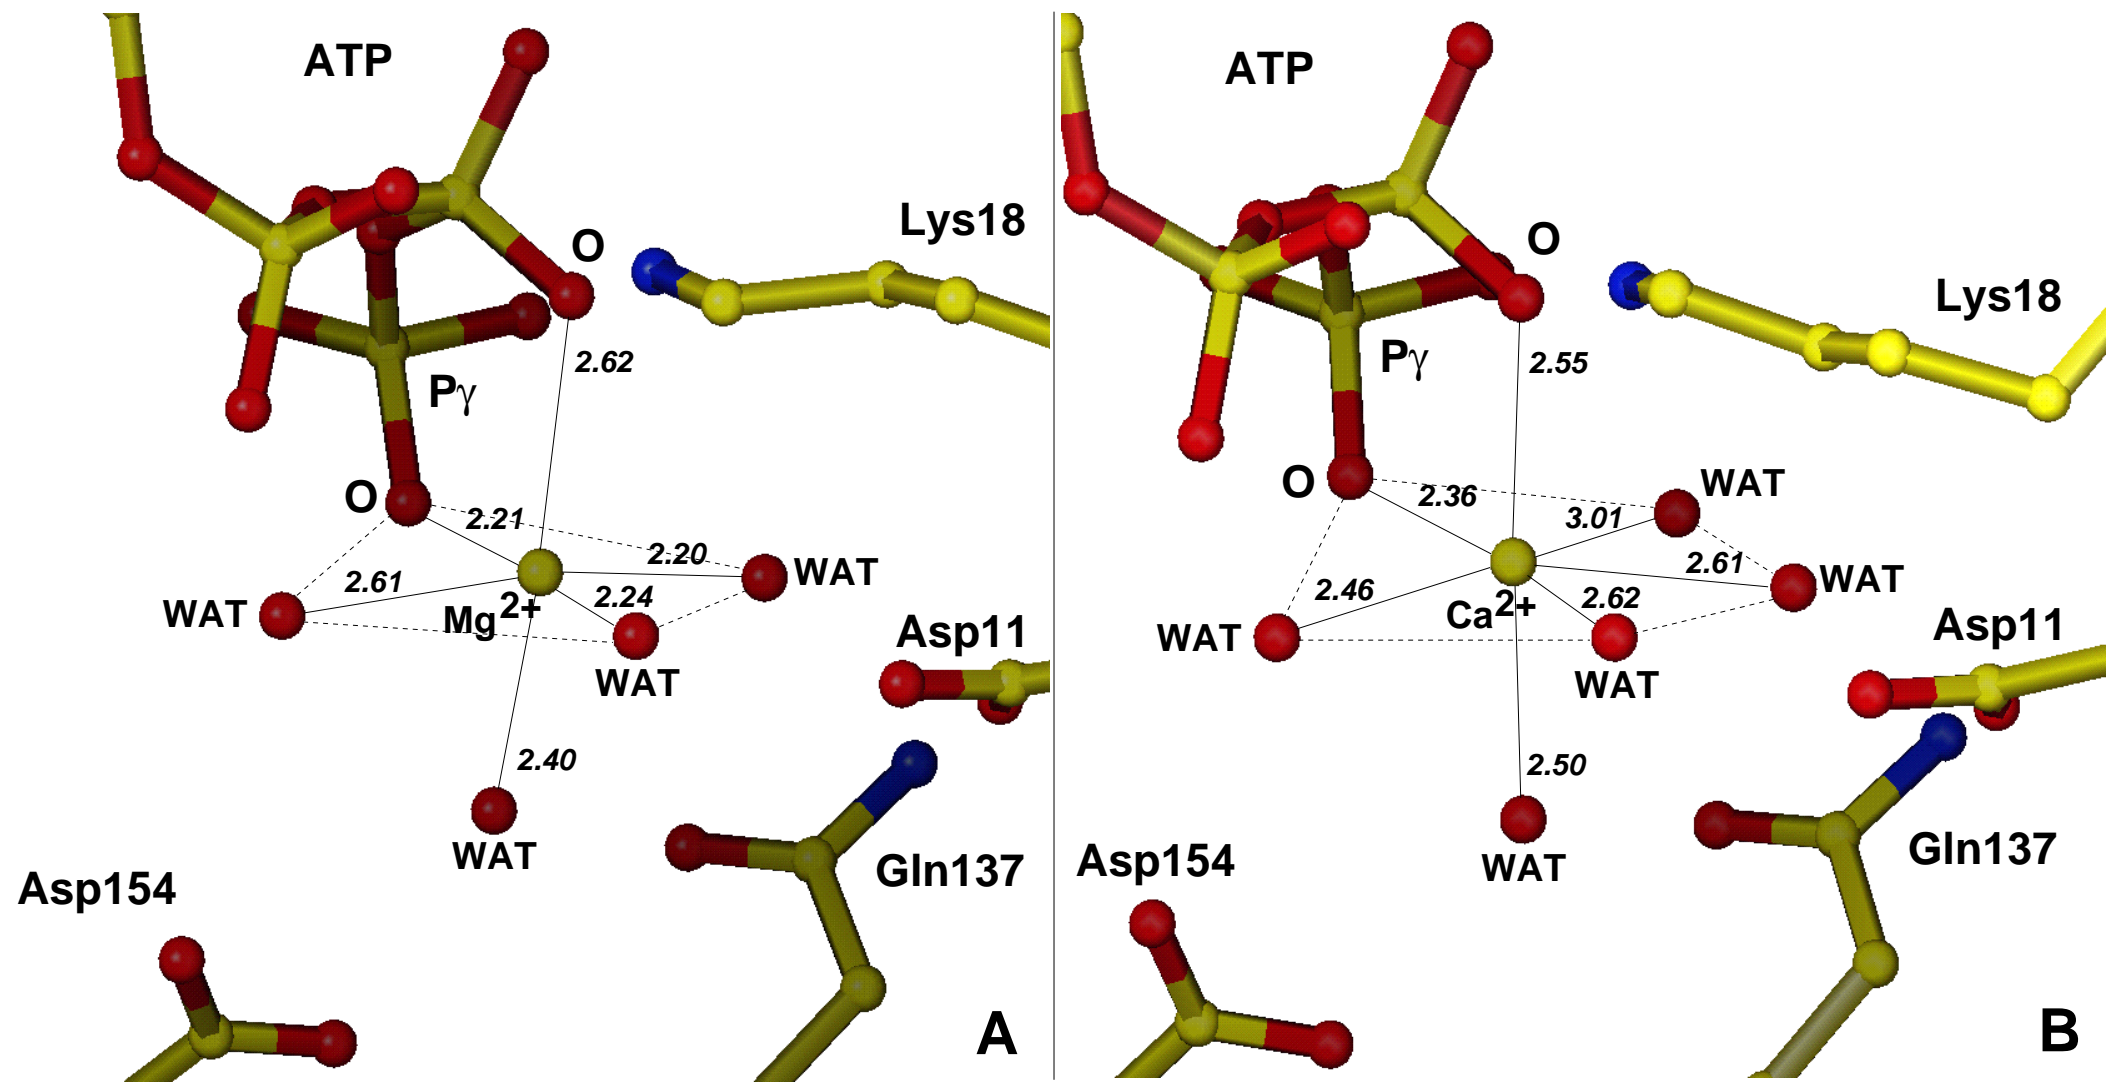

Supplement: pnas_0832273100_6.pdf [file pnas_0832273100_6.pdf]
